# Supplementary material for: Analysis of student reasoning about Michaelis–Menten enzyme kinetics: mixed conceptions of enzyme inhibition
Source: Royal Society of Chemistry journal article supplement (doi:10.1039/c8rp00276b), 2019-01-01
Supplement: c8rp00276b1.pdf [file c8rp00276b1.pdf]

**Supplemental Information**—Resource graphs for students' conceptions of competitive, noncompetitive, and uncompetitive enzyme inhibition.

|               | Competitive Inhibition | Noncompetitive Inhibition | Uncompetitive Inhibition |
|---------------|------------------------|---------------------------|--------------------------|
| <b>Sarah</b>  |                        |                           |                          |
| <b>Ellie</b>  |                        |                           |                          |
| <b>Kelly</b>  |                        |                           |                          |
| <b>Alan</b>   |                        |                           |                          |
| <b>Amanda</b> |                        |                           |                          |

|         |  |  |  |
|---------|--|--|--|
| Cathy   |  |  |  |
| Lex     |  |  |  |
| Malcolm |  |  |  |
| Zara    |  |  |  |
| Vivian  |  |  |  |
| Karen   |  |  |  |

## Supplemental Information—continued

|                            |                                                                                                                                                                                                                                                                                                                                                                                                                                                                                                                                                                                                                                                                                                                                                                               |                                                                                                                                                                                                                                                                                                                                                                                                                                                                  |                                                                                                                                                                                                                                                                                                                                                                                                                                                                                                        |
|----------------------------|-------------------------------------------------------------------------------------------------------------------------------------------------------------------------------------------------------------------------------------------------------------------------------------------------------------------------------------------------------------------------------------------------------------------------------------------------------------------------------------------------------------------------------------------------------------------------------------------------------------------------------------------------------------------------------------------------------------------------------------------------------------------------------|------------------------------------------------------------------------------------------------------------------------------------------------------------------------------------------------------------------------------------------------------------------------------------------------------------------------------------------------------------------------------------------------------------------------------------------------------------------|--------------------------------------------------------------------------------------------------------------------------------------------------------------------------------------------------------------------------------------------------------------------------------------------------------------------------------------------------------------------------------------------------------------------------------------------------------------------------------------------------------|
| Tim                        | <p>Competitive Inhibition diagram for Tim. The central node is 'Competitive Inhibition' (red). It branches into 'reaction scheme with inhibitor' (red), 'interaction with enzyme' (red), and 'kinetic parameters' (red). 'interaction with enzyme' branches into 'does not influence <math>V_{max}</math>' (red) and 'binds active site of enzyme' (red). 'kinetic parameters' branches into 'increases <math>K_m</math>' (red) and 'unsure how <math>K_m</math> changes' (red).</p>                                                                                                                                                                                                                                                                                          | <p>Noncompetitive Inhibition diagram for Tim. The central node is 'Noncompetitive Inhibition' (green). It branches into 'reaction scheme with inhibitor' (green), 'interaction with enzyme' (green), and 'kinetic parameters' (green). 'interaction with enzyme' branches into 'decreases <math>V_{max}</math>' (green) and 'binds allosteric site of enzyme' (green). 'kinetic parameters' branches into 'does not influence <math>K_m</math>' (green).</p>     | <p>Uncompetitive Inhibition diagram for Tim. The central node is 'Uncompetitive Inhibition' (purple). It branches into 'reaction scheme with inhibitor' (purple), 'interaction with enzyme' (purple), and 'kinetic parameters' (purple). 'interaction with enzyme' branches into 'decreases <math>V_{max}</math>' (purple) and 'binds enzyme-substrate complex' (purple). 'kinetic parameters' branches into 'decreases <math>K_m</math>' (purple) and 'influences <math>K_m</math>' (purple).</p>     |
| Claire                     | <p>Competitive Inhibition diagram for Claire. The central node is 'Competitive Inhibition' (red). It branches into 'reaction scheme with inhibitor' (red), 'interaction with enzyme' (red), and 'kinetic parameters' (red). 'interaction with enzyme' branches into 'does not influence <math>V_{max}</math>' (red) and 'binds active site of enzyme' (red). 'kinetic parameters' branches into 'increases <math>K_m</math>' (red) and 'unsure how <math>K_m</math> changes' (red).</p>                                                                                                                                                                                                                                                                                       | <p>Noncompetitive Inhibition diagram for Claire. The central node is 'Noncompetitive Inhibition' (green). It branches into 'reaction scheme with inhibitor' (green), 'interaction with enzyme' (green), and 'kinetic parameters' (green). 'interaction with enzyme' branches into 'decreases <math>V_{max}</math>' (green) and 'binds allosteric site of enzyme' (green). 'kinetic parameters' branches into 'does not influence <math>K_m</math>' (green).</p>  | <p>Uncompetitive Inhibition diagram for Claire. The central node is 'Uncompetitive Inhibition' (purple). It branches into 'reaction scheme with inhibitor' (purple), 'interaction with enzyme' (purple), and 'kinetic parameters' (purple). 'interaction with enzyme' branches into 'decreases <math>V_{max}</math>' (purple) and 'binds enzyme-substrate complex' (purple). 'kinetic parameters' branches into 'decreases <math>K_m</math>' (purple) and 'influences <math>K_m</math>' (purple).</p>  |
| Carrie                     | <p>Competitive Inhibition diagram for Carrie. The central node is 'Competitive Inhibition' (red). It branches into 'reaction scheme with inhibitor' (red), 'interaction with enzyme' (red), and 'kinetic parameters' (red). 'interaction with enzyme' branches into 'does not influence <math>V_{max}</math>' (red) and 'binds active site of enzyme' (red). 'kinetic parameters' branches into 'increases <math>K_m</math>' (red) and 'unsure how <math>K_m</math> changes' (red).</p>                                                                                                                                                                                                                                                                                       | <p>Noncompetitive Inhibition diagram for Carrie. The central node is 'Noncompetitive Inhibition' (green). It branches into 'reaction scheme with inhibitor' (green), 'interaction with enzyme' (green), and 'kinetic parameters' (green). 'interaction with enzyme' branches into 'decreases <math>V_{max}</math>' (green) and 'binds allosteric site of enzyme' (green). 'kinetic parameters' branches into 'does not influence <math>K_m</math>' (green).</p>  | <p>Uncompetitive Inhibition diagram for Carrie. The central node is 'Uncompetitive Inhibition' (purple). It branches into 'reaction scheme with inhibitor' (purple), 'interaction with enzyme' (purple), and 'kinetic parameters' (purple). 'interaction with enzyme' branches into 'decreases <math>V_{max}</math>' (purple) and 'binds enzyme-substrate complex' (purple). 'kinetic parameters' branches into 'decreases <math>K_m</math>' (purple) and 'influences <math>K_m</math>' (purple).</p>  |
| Summary for each inhibitor | <p>Summary diagram for Competitive Inhibition. The central node is 'Competitive Inhibition' (red). It branches into 'reaction scheme with inhibitor' (red), 'interaction with enzyme' (red), and 'kinetic parameters' (red). 'interaction with enzyme' branches into 'does not influence <math>V_{max}</math>' (red) and 'binds active site of enzyme' (red). 'kinetic parameters' branches into 'increases <math>K_m</math>' (red) and 'unsure how <math>K_m</math> changes' (red).</p>                                                                                                                                                                                                                                                                                      | <p>Summary diagram for Noncompetitive Inhibition. The central node is 'Noncompetitive Inhibition' (green). It branches into 'reaction scheme with inhibitor' (green), 'interaction with enzyme' (green), and 'kinetic parameters' (green). 'interaction with enzyme' branches into 'decreases <math>V_{max}</math>' (green) and 'binds allosteric site of enzyme' (green). 'kinetic parameters' branches into 'does not influence <math>K_m</math>' (green).</p> | <p>Summary diagram for Uncompetitive Inhibition. The central node is 'Uncompetitive Inhibition' (purple). It branches into 'reaction scheme with inhibitor' (purple), 'interaction with enzyme' (purple), and 'kinetic parameters' (purple). 'interaction with enzyme' branches into 'decreases <math>V_{max}</math>' (purple) and 'binds enzyme-substrate complex' (purple). 'kinetic parameters' branches into 'decreases <math>K_m</math>' (purple) and 'influences <math>K_m</math>' (purple).</p> |
| Summary for all inhibitors | <p>Summary diagram for all inhibitors. The central node is 'ENZYME INHIBITION' (grey). It branches into 'Competitive Inhibition' (red), 'Noncompetitive Inhibition' (green), and 'Uncompetitive Inhibition' (purple). 'Competitive Inhibition' branches into 'reaction scheme with inhibitor' (red), 'interaction with enzyme' (red), and 'kinetic parameters' (red). 'Noncompetitive Inhibition' branches into 'reaction scheme with inhibitor' (green), 'interaction with enzyme' (green), and 'kinetic parameters' (green). 'Uncompetitive Inhibition' branches into 'reaction scheme with inhibitor' (purple), 'interaction with enzyme' (purple), and 'kinetic parameters' (purple). A dashed line labeled 'Distinct Mechanism' connects the three inhibition types.</p> |                                                                                                                                                                                                                                                                                                                                                                                                                                                                  |                                                                                                                                                                                                                                                                                                                                                                                                                                                                                                        |
